# Supplementary material for: Coexistence of an antiferromagnetically coupled dimer and isolated paramagnetic spin in 4-azaindol-2-yl nitronyl nitroxide crystalElectronic supplementary information available: final atomic positions, calculated atomic spin population, calculated optimized structure of 2 and the dimeric structures used to calculate J. See http://www.rsc.org/suppdata/nj/b2/b210820h/
Source: Royal Society of Chemistry journal article supplement (doi:10.1039/b210820h), 2003-04-09
Supplement: b210820h.pdf [file b210820h.pdf]

## Electronic supplementary information(ESI)

### Coexistence of antiferromagnetically coupled dimer and isolated paramagnetic spin in 4-azaindol-2-yl nitronyl nitroxide crystal

Hideaki Nagashima, Noriko Hashimoto, Hidenari Inoue, and Naoki Yoshioka\*

*Department of Applied Chemistry, Faculty of Science and Technology, Keio University, Kohoku-ku, Yokohama 223-8522, Japan*

**Table S1** Atomic spin population of **2**.

**Table S2** Final position parameters of **2**.

**Fig. S1** UB3LYP/cc-pVDZ optimized structure of **2** and its atomic numbering.

**Fig. S2** Selected dimeric structures to calculate  $J$  values.

**Table S1** Atomic spin population of **2**<sup>a,b</sup>

|       |           |       |           |
|-------|-----------|-------|-----------|
| O(1)  | 0.368320  | H(21) | -0.001492 |
| O(2)  | 0.306082  | H(22) | 0.000223  |
| N(3)  | 0.271512  | H(23) | -0.000788 |
| N(4)  | 0.284650  | H(24) | -0.000630 |
| N(5)  | -0.002866 | H(25) | -0.000467 |
| N(6)  | -0.015021 | H(26) | 0.000193  |
| C(7)  | -0.182771 | H(27) | -0.000798 |
| C(8)  | -0.012303 | H(28) | -0.000451 |
| C(9)  | -0.010888 | H(29) | -0.000683 |
| C(10) | 0.018924  | H(30) | 0.000144  |
| C(11) | 0.001210  | H(31) | -0.000784 |
| C(12) | 0.001538  | H(32) | -0.000674 |
| C(13) | 0.019350  | H(33) | 0.000300  |
| C(14) | 0.041947  | H(34) | 0.003038  |
| C(15) | -0.071726 | H(35) | -0.000119 |
| C(16) | -0.017701 | H(36) | 0.001394  |
| C(17) | 0.014302  | H(37) | -0.000289 |
| C(18) | 0.004165  |       |           |
| C(19) | -0.024350 |       |           |
| C(20) | 0.007507  |       |           |

<sup>a</sup> UB3LYP/EPR-II//UB3LYP/cc-pVDZ

<sup>b</sup> see Fig. S1 for atomic numbering

**Table S2** Final position parameters of **2**

| atom | <i>x</i>   | <i>y</i>   | <i>z</i>   | <i>U</i> <sub>iso</sub> |
|------|------------|------------|------------|-------------------------|
| O1   | 0.98722(9) | -0.1229(1) | 0.1606(1)  | 0.0673(5)               |
| O2   | 0.77211(8) | 0.0332(1)  | 0.13737(9) | 0.0604(4)               |
| N3   | 0.92065(9) | -0.1058(1) | 0.15604(9) | 0.0454(4)               |
| N4   | 0.81801(9) | -0.0317(1) | 0.14415(8) | 0.0424(3)               |
| N5   | 0.89189(9) | 0.1411(1)  | 0.15262(8) | 0.0408(3)               |
| N6   | 1.0735(1)  | 0.2214(1)  | 0.17528(9) | 0.0516(4)               |
| C7   | 0.8905(1)  | -0.0233(1) | 0.15193(9) | 0.0389(4)               |
| C8   | 0.8622(1)  | -0.1788(1) | 0.1445(1)  | 0.0470(4)               |
| C9   | 0.7994(1)  | -0.1260(1) | 0.1551(1)  | 0.0454(4)               |
| C10  | 0.8997(2)  | -0.2548(2) | 0.1951(2)  | 0.0665(7)               |
| C11  | 0.8360(2)  | -0.2118(2) | 0.0712(2)  | 0.0715(7)               |
| C12  | 0.8090(2)  | -0.1287(2) | 0.2282(1)  | 0.0666(6)               |
| C13  | 0.7166(1)  | -0.1474(2) | 0.1041(2)  | 0.0649(6)               |
| C14  | 0.9286(1)  | 0.0607(1)  | 0.15518(9) | 0.0389(4)               |
| C15  | 1.0019(1)  | 0.0767(1)  | 0.1628(1)  | 0.0437(4)               |
| C16  | 0.9417(1)  | 0.2097(1)  | 0.15966(9) | 0.0401(4)               |
| C17  | 1.0110(1)  | 0.1717(1)  | 0.16622(9) | 0.0409(4)               |
| C18  | 1.0638(1)  | 0.3101(2)  | 0.1763(1)  | 0.0561(5)               |
| C19  | 0.9960(1)  | 0.3524(2)  | 0.1681(1)  | 0.0538(5)               |
| C20  | 0.9326(1)  | 0.3027(1)  | 0.1598(1)  | 0.0478(4)               |
| O21  | 0.5531(1)  | 0.0552(2)  | 0.1333(1)  | 0.0970(7)               |
| O22  | 0.77027(7) | 0.22556(9) | 0.18392(7) | 0.0491(3)               |
| N23  | 0.5993(1)  | 0.1113(1)  | 0.1276(1)  | 0.0577(5)               |
| N24  | 0.70168(8) | 0.1931(1)  | 0.15187(8) | 0.0394(3)               |
| N25  | 0.7792(1)  | 0.1207(1)  | 0.29220(8) | 0.0466(4)               |
| N26  | 0.7277(2)  | -0.0178(1) | 0.3974(1)  | 0.0731(6)               |
| C27  | 0.6702(1)  | 0.1320(1)  | 0.1768(1)  | 0.0427(4)               |
| C28  | 0.5833(1)  | 0.1514(2)  | 0.0593(1)  | 0.0535(5)               |
| C29  | 0.6454(1)  | 0.2270(1)  | 0.0823(1)  | 0.0443(4)               |
| C30  | 0.5002(2)  | 0.1845(3)  | 0.0229(2)  | 0.0820(9)               |
| C31  | 0.5969(2)  | 0.0769(2)  | 0.0180(2)  | 0.0715(7)               |
| C32  | 0.6169(2)  | 0.3176(2)  | 0.0946(1)  | 0.0573(5)               |
| C33  | 0.6867(2)  | 0.2385(2)  | 0.0381(1)  | 0.0590(6)               |
| C34  | 0.7059(1)  | 0.0953(1)  | 0.2453(1)  | 0.0444(4)               |
| C35  | 0.6752(2)  | 0.0379(1)  | 0.2759(1)  | 0.0535(5)               |
| C36  | 0.7960(1)  | 0.0799(1)  | 0.3537(1)  | 0.0504(5)               |
| C37  | 0.7315(2)  | 0.0286(1)  | 0.3451(1)  | 0.0549(5)               |
| C38  | 0.7909(2)  | -0.0117(2) | 0.4574(2)  | 0.0800(9)               |
| C39  | 0.8571(2)  | 0.0362(2)  | 0.4690(1)  | 0.0749(8)               |
| C40  | 0.8612(2)  | 0.0839(2)  | 0.4169(1)  | 0.0637(6)               |

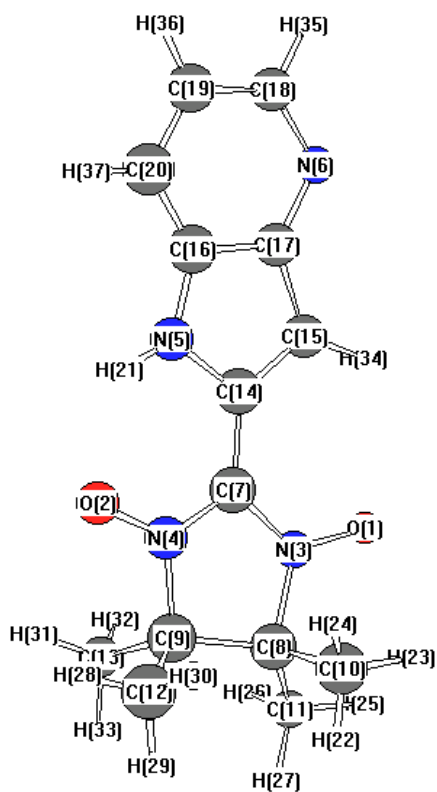

**Fig. S1** UB3LYP/cc-pVDZ optimized structure of **2** and its atomic numbering.

A-B

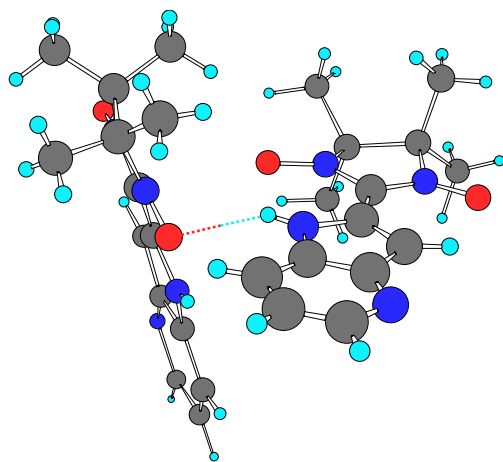

A-A\*

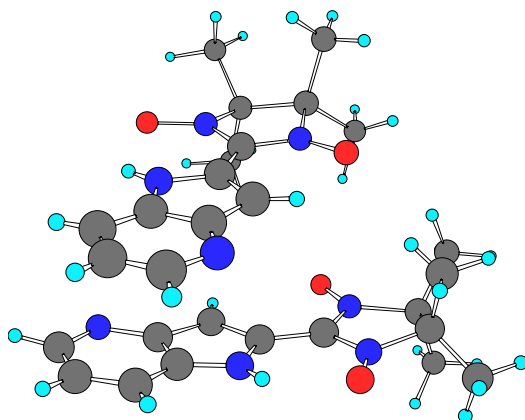

A-B\*  
(A\*-B)

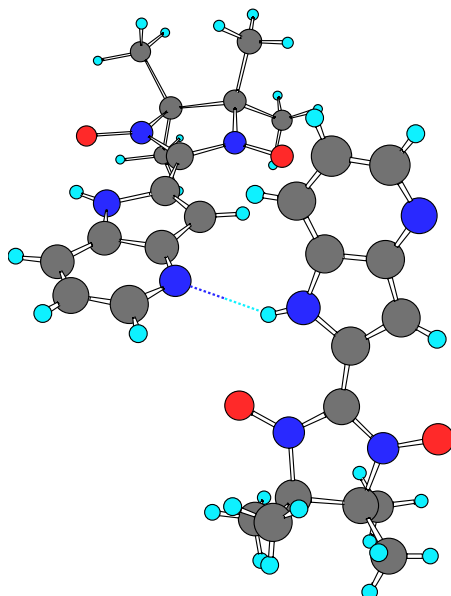

Fig. S2 Selected dimeric structures to calculate  $J$  values.
